# Supplementary material for: An RBD-Based Diagnostic Method Useful for the Surveillance of Protective Immunity against SARS-CoV-2 in the Population
Source: MDPI journal article supplement (doi:10.3390/diagnostics12071629), 2022-07-05
Supplement: s1 [file s1]

|            |                                                               |     |
|------------|---------------------------------------------------------------|-----|
| Bacterial  | -----mnitnlcpfgevfnatrfasvyawnrkrisncvadysvlynsasfstfk        | 49  |
| Eukaryotic | rvqptesivrfrpmitnlcpfgevfnatrfasvyawnrkrisncvadysvlynsasfstfk | 60  |
|            | *****                                                         |     |
| Bacterial  | cygvsptklndlcftnvysdfvirgdevrqiapgqtgkiadynyklpddftgcviawns   | 109 |
| Eukaryotic | cygvsptklndlcftnvysdfvirgdevrqiapgqtgkiadynyklpddftgcviawns   | 120 |
|            | *****                                                         |     |
| Bacterial  | nnldskvggnynylyrlfrksnlkpferdisteiyaqgstpcngvegfcyflqsygfq    | 169 |
| Eukaryotic | nnldskvggnynylyrlfrksnlkpferdisteiyaqgstpcngvegfcyflqsygfq    | 180 |
|            | *****                                                         |     |
| Bacterial  | ptngvgyqpyrvvvlsfellhapatv-----                               | 195 |
| Eukaryotic | ptngvgyqpyrvvvlsfellhapatvcgpkkstnlvknkcvnf                   | 223 |
|            | *****                                                         |     |

**Figure S1.** Alignment of the RBD amino acid sequences used for bacterial expression in BL21(DE3) cells or eukaryotic expression in mammalian HEK293T cells. Asterisks show identical amino acids.
